# Supplementary material
Source: PubMed Central journal article supplement (PMC2657053)
Supplement: supp_90286.2008_figS2.pdf [file supp_90286.2008_figS2.pdf]

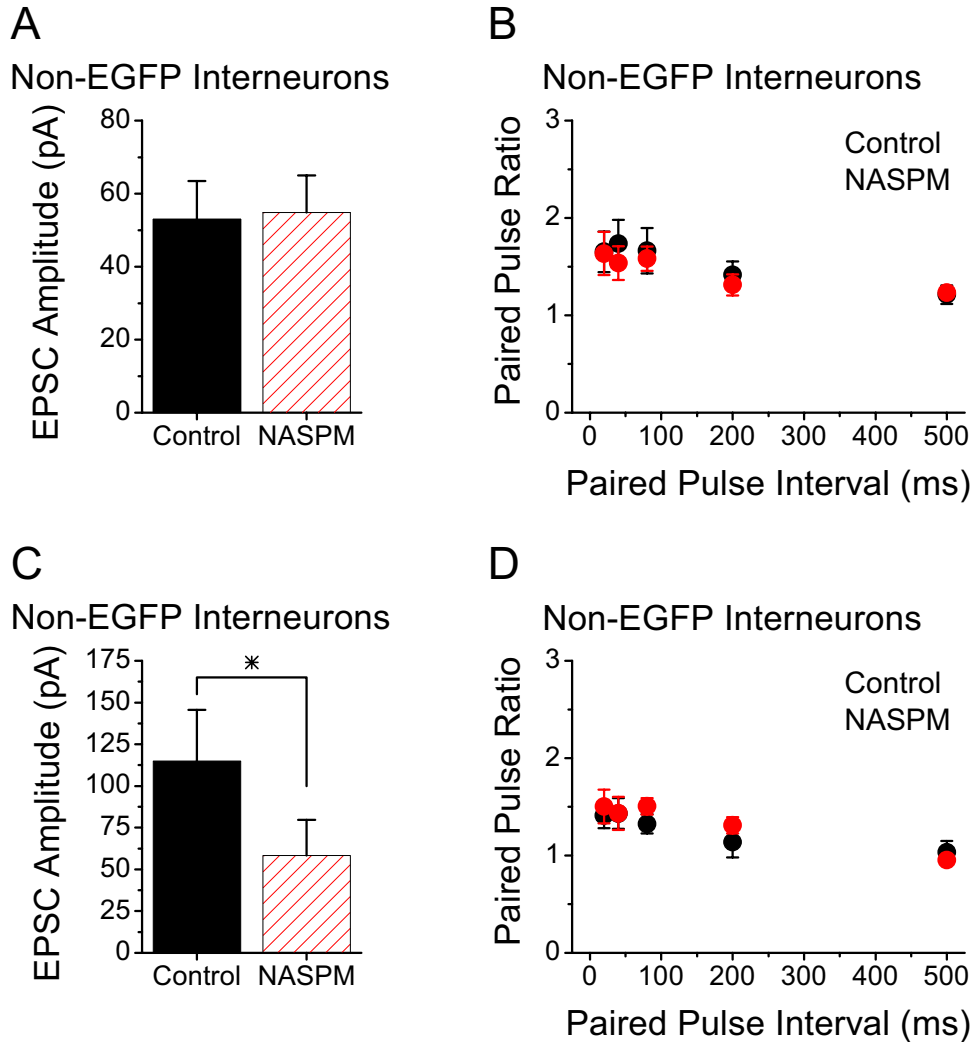

**Supplemental Figure 2. NASPM has no effect on paired-pulse facilitation at Schaffer collateral synapses onto non-EGFP interneurons that have or do not have calcium-permeable AMPA receptors.**

**A**, Average amplitude of first EPSCs from subgroup of non-EGFP interneurons in which NASPM (200 $\mu$ M) did not cause a significant decrease ( $n=5$ ,  $p>0.7$ ). **B**, Group results for paired-pulse ratios versus interval from cells without calcium-permeable AMPA receptors (from A) show NASPM has no effect on paired pulse facilitation ( $p>0.5$ ). **C**, Average amplitude of first EPSC from subgroup of non-EGFP interneurons in which NASPM (200  $\mu$ M) did cause a significant decrease in the first EPSC amplitude ( $n=5$ ). **D**, Group results for paired-pulse ratios versus interval from cells with calcium-permeable AMPA receptors (from C) show NASPM has no effect on paired pulse facilitation ( $p>0.5$ ). \*=significant,  $p<0.05$ .
