# Supplementary material
Source: PubMed Central journal article supplement (PMC2657053)
Supplement: supp_90286.2008_figS3.pdf [file supp_90286.2008_figS3.pdf]

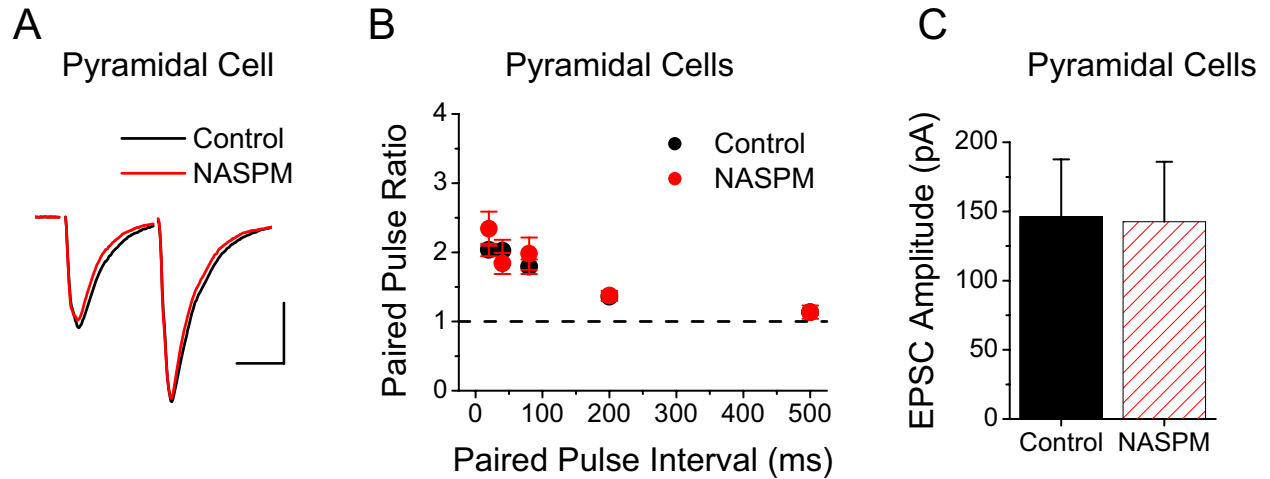

**Supplemental Figure 3. NASPM has no effect on the Schaffer collateral induced paired-pulse facilitation of pyramidal cells.**

**A**, Example of EPSCs recorded from a pyramidal cell before and during application of a calcium-permeable AMPA and kainate receptors antagonist, NASPM (200  $\mu$ M). Scale bars: 20 ms, 300 pA.

**B**, Group results for paired-pulse ratios versus interval from pyramidal cells before (solid black circles) and during application of NASPM (solid red circles) show no change in paired-pulse ratio with NASPM ( $n=4$ ,  $p>0.1$ ). **C**, Average amplitude of first EPSC for experiments in B. There was no change in the amplitude of the EPSC with the application of NASPM, indicating that these cells do not express postsynaptic calcium-permeable AMPA receptors ( $p>0.3$ ).
