# Supplementary material
Source: PubMed Central journal article supplement (PMC2657053)
Supplement: supp_90286.2008_figS4.pdf [file supp_90286.2008_figS4.pdf]

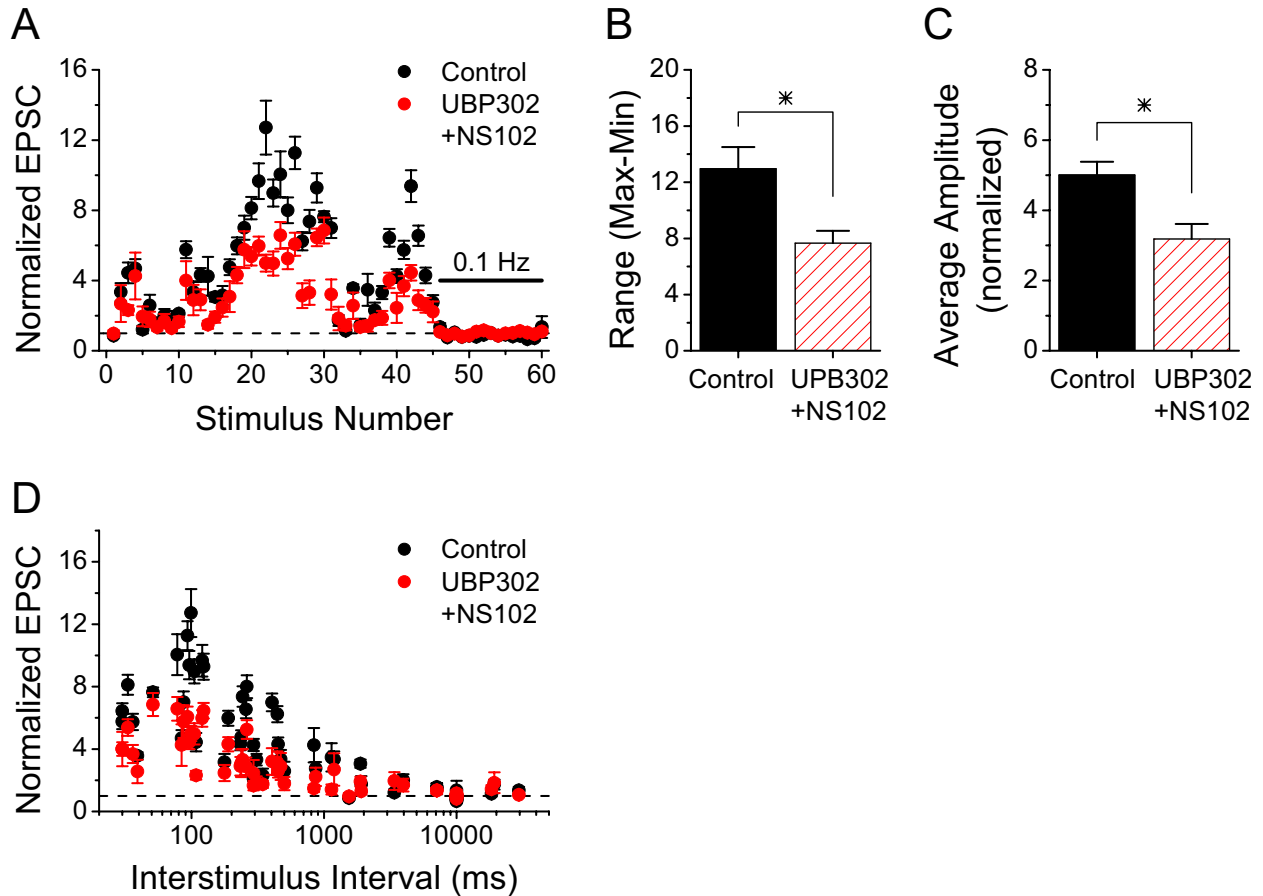

**Supplemental Figure 4. Large short-term facilitation during natural pattern stimulation is mediated through kainate receptors.**

**A**, Group results showing that blocking kainate receptors with combined application of 15  $\mu$ M UBP302 and 20  $\mu$ M NS102 (solid red circles) reduces short-term facilitation at Schaffer collateral synapses onto SOM interneurons in response to natural stimulus pattern (n=8). **B**, Average range of responses (maximum – minimum) is reduced by UBP302 + NS102. **C**, Average amplitude of the response to the natural stimulus pattern is reduced by these two kainate receptor antagonists. **D**, Responses to natural stimulus pattern plotted versus interstimulus interval (in ms) show that the effect of UBP302 + NS102 is greatest at shorter intervals. \*=significant,  $p < 0.05$ .
